# Supplementary material for: Corticosterone levels reflect variation in metabolic rate, independent of ‘stress’
Source: PubMed Central journal article supplement (PMC6115469; doi:10.1038/s41598-018-31258-z), 2018-08-29
Supplement: 41598_2018_31258_MOESM1_ESM.pdf [file 41598_2018_31258_MOESM1_ESM.pdf]

## SUPPLEMENTARY MATERIAL to

### “Corticosterone levels reflect variation in metabolic rate, independent of ‘stress’”

Blanca Jimeno<sup>1,2</sup>, Michaela Hau<sup>2,3</sup> & Simon Verhulst<sup>1</sup>

1. Groningen Institute for Evolutionary Life Sciences, University of Groningen, the Netherlands.
2. Max Planck Institute for Ornithology, Seewiesen, Germany
3. University of Konstanz, Germany.

Table S1: Absolute CORT concentrations (ng/ml, log transformed) in relation to sampling variables. Sampling order (2): individual sampled second; First trial (yes): first respirometer session for that individual. Round (afternoon): individual was sampled in the afternoon.

|                       | Estimate | SE    | d.f.  | F        | p     |
|-----------------------|----------|-------|-------|----------|-------|
| Intercept             | 2.263    | 0.122 | 44.64 |          |       |
| Sampling order (2)    | 0.152    | 0.145 | 43.19 | 1.096    | 0.301 |
| First Trial (yes)     | 0.105    | 0.143 | 85.33 | 0.534    | 0.467 |
| Round (afternoon)     | 0.005    | 0.149 | 43.76 | 0.001    | 0.972 |
| <b>Random factors</b> |          |       |       | Variance |       |
| Bird ID               |          |       |       | 0.081    |       |
| Plate                 |          |       |       | 0.039    |       |
| Residual              |          |       |       | 0.314    |       |

Table S2: Glucose concentrations (mg/dL) in relation to sampling variables. Gluc. order (2): first glucose sample was taken under stress, second in baseline; Round (afternoon): individual was sampled in the afternoon.

|                       | Estimate | SE    | d.f.  | F        | p     |
|-----------------------|----------|-------|-------|----------|-------|
| Intercept             | 5.922    | 0.026 | 58.00 |          |       |
| Gluc. order (2)       | 0.055    | 0.031 | 58.00 | 3.173    | 0.080 |
| Round (afternoon)     | -0.034   | 0.031 | 58.00 | 1.174    | 0.283 |
| <b>Random factors</b> |          |       |       | Variance |       |
| Bird ID               |          |       |       | 0.000    |       |
| Plate                 |          |       |       | 0.000    |       |
| Residual              |          |       |       | 0.015    |       |

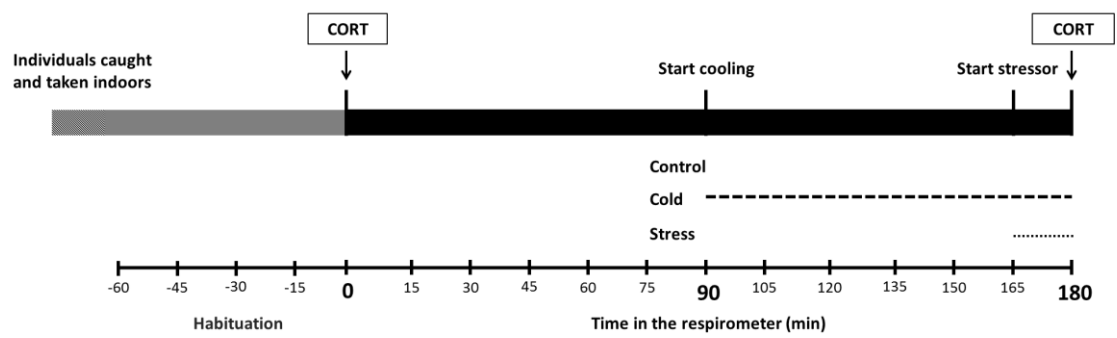

Figure S1: Timeline of the experimental procedure.

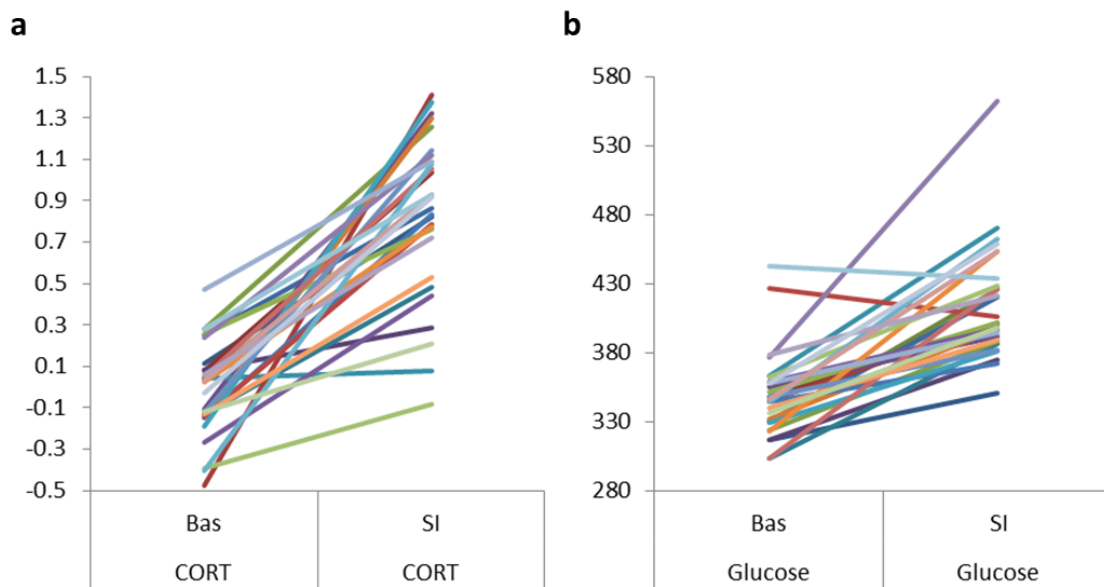

Figure S2: Corticosterone (a, ng/ml) and glucose (b, mg/dl) at baseline (within 2 min. after disturbance) and stress-induced (after 20 min. of restraint). Colors correspond to the same individuals in the two panels.
